# Supplementary material for: No Difference in the Prevalence of HIV-1 gag Cytotoxic T-Lymphocyte-Associated Escape Mutations in Viral Sequences from Early and Late Parts of the HIV-1 Subtype C Pandemic in Botswana
Source: Vaccines (Basel). 2023 May 19;11(5):1000. doi: 10.3390/vaccines11051000 (PMC10221913; doi:10.3390/vaccines11051000)
Supplement: Supplementary file 1 [file vaccines-11-01000-s001.zip › vaccines-2390797-supplementary.pdf]

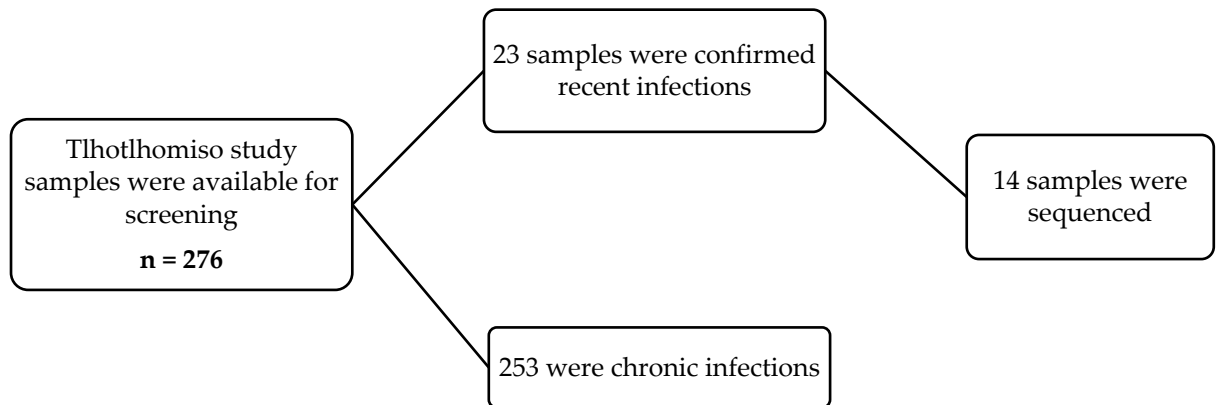

**Supplementary Figure S1.** The selection of 14 recent infections from Tlhotlhomiso study used the LTP.

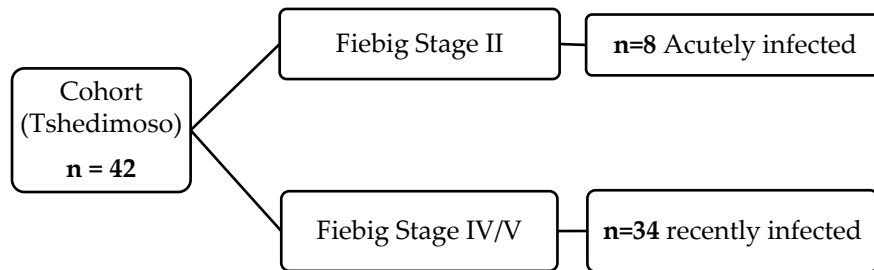

**Supplementary Figure S2.** The selection of 42 sequences used as early time point (Tshedimoso study).

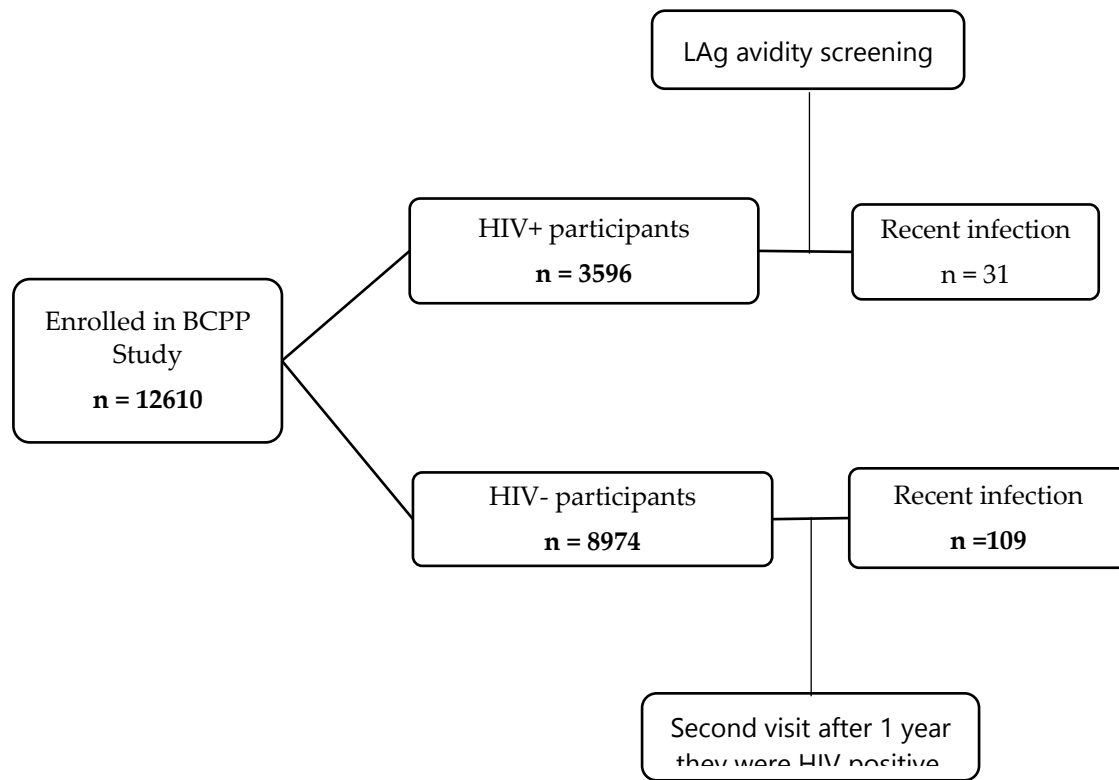

**Supplementary Figure S3.** The selection of 140 BCPP study for recent infection used LTP.

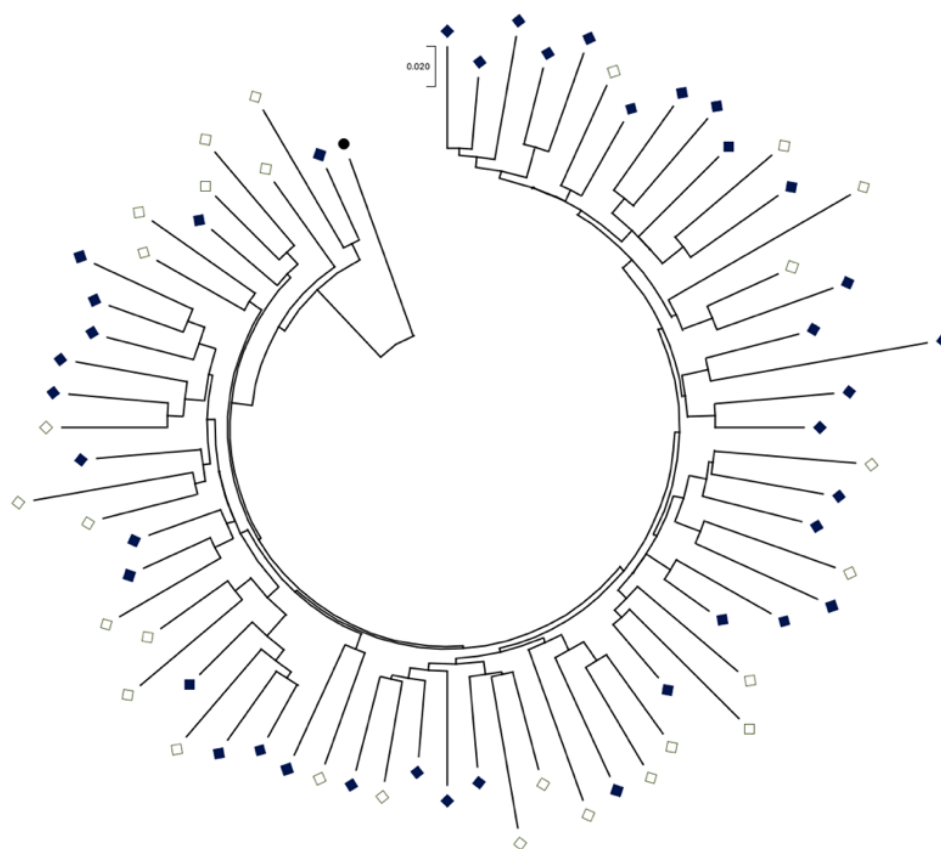

◆ Early time point sequences, ◇ Later time point sequences, ● HXB2 reference sequence

**Supplementary Figure S4.** Maximum likelihood phylogenetic tree based on p17 (aa = 130 base-pairs).

**Supplementary Table S1:** Deleterious and neutral escape mutations in HIV-1C *gag* that have not been reported.

| HIV-1C variant | <i>PROVEAN SCORE</i> | <i>PROVEAN prediction</i> |
|----------------|----------------------|---------------------------|
| K26G           | -3.833               | Deleterious               |
| E52L           | -4.933               | Deleterious               |
| E55A           | -3.348               | Deleterious               |
| I60Q           | -4.049               | Deleterious               |
| L64Q           | -3.711               | Deleterious               |
| L75E           | -3.945               | Deleterious               |
| V88C           | -3.020               | Deleterious               |
| T97D           | -3.651               | Deleterious               |
| Q108E          | -1.484               | Neutral                   |
| S111K          | -1.784               | Neutral                   |
| K113C          | -3.050               | Deleterious               |
| K114Q          | -1.699               | Neutral                   |
| Q116T          | -2.800               | Deleterious               |
| A118Q          | -2.181               | Neutral                   |
| A120E          | -1.465               | neutral                   |
| A120K          | -1.626               | Neutral                   |
| D121A          | 0.458                | Neutral                   |
| T122A          | 1.412                | Neutral                   |
| T122D          | 0.127                | Neutral                   |
| G123D          | -2.543               | Deleterious               |
| H124D          | 0.127                | Neutral                   |
| S125K          | -1.157               | Neutral                   |
| V159I          | 0.043                | Neutral                   |
| S173T          | 0.627                | Neutral                   |
| E203D          | -3.455               | Deleterious               |
| T375N          | 0.890                | Neutral                   |
| T375S          | 0.123                | Neutral                   |

*The prevalence of these mutations was higher at ETP compared to LTP, all the p-values were <0.01.*
